# Supplementary material for: Pleiotropic Effects of a KCNQ1 Variant on Lipid Profiles and Type 2 Diabetes: A Family-Based Study in China
Source: Hindawi journal article supplement (doi:10.1155/2020/8278574), 2020-01-13
Supplement: f1 [file 8278574.f1.pdf]

## Supplementary Files

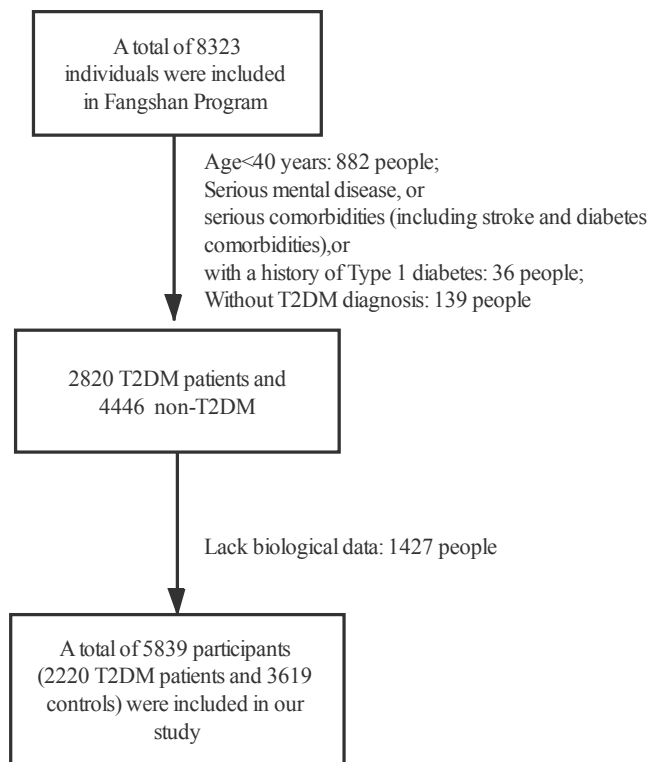

Figure S1. The flow chart of the study population selection.

Table S1: Association between different lipid parameters and T2DM.

| Variables | $\beta$ (SE)   | PC, % (95%CI, %)        | P                |
|-----------|----------------|-------------------------|------------------|
| TC        | 0.056 (0.018)  | 5.74 (2.11, 9.50)       | <b>0.003</b>     |
| TG        | 0.135 (0.016)  | 14.42 (10.83, 18.13)    | <b>&lt;0.001</b> |
| LDL-C     | 0.065 (0.024)  | 6.71 (1.89, 11.75)      | <b>0.006</b>     |
| HDL-C     | -0.292 (0.061) | -25.33 (-33.76, -15.83) | <b>&lt;0.001</b> |
| Apo-A     | -0.091 (0.055) | -8.73 (-18.04, 1.63)    | 0.096            |
| Apo-B     | 0.239 (0.079)  | 26.93 (8.69, 48.24)     | <b>0.003</b>     |

$\beta$ , estimate; SE, standard error; PC, percentage change; CI, confidence interval; TC, total cholesterol; TG, triglyceride; LDL-C, low density lipoprotein cholesterol; HDL-C, high density lipoprotein cholesterol; Apo-A, apolipoprotein-A; Apo-B, apolipoprotein-B; T2DM, type 2 diabetes mellites.

**Notes:** All models were adjusted for age, sex, smoking and drinking status, hypertension, coronary heart disease, and body mass index. P values <0.05 were shown in bold.

Table S2: The associations between KCNQ1 rs2237895 and lipid parameters, T2DM after stratification by BMI, smoking, and drinking habits.

| Variables                 | $\beta$ (SE)   | PC, % (95%CI, %)     | P                | $\beta$ (SE)                           | PC, % (95%CI, %)     | P                |
|---------------------------|----------------|----------------------|------------------|----------------------------------------|----------------------|------------------|
| <b>BMI&lt;24 (n=1667)</b> |                |                      |                  | <b>BMI<math>\geq</math>24 (n=4135)</b> |                      |                  |
| <b>Lipid parameters</b>   |                |                      |                  |                                        |                      |                  |
| TC                        | 0.035 (0.025)  | 3.58 (-1.40, 8.82)   | 0.162            | 0.075 (0.044)                          | 7.76 (-1.22, 17.56)  | 0.093            |
| TG                        | -0.064 (0.038) | -6.22 (-12.90, 0.96) | 0.088            | 0.067 (0.039)                          | 6.93 (-0.90, 15.37)  | 0.084            |
| LDL-C                     | 0.032 (0.020)  | 3.30 (-0.59, 7.34)   | 0.098            | 0.047 (0.035)                          | 4.81 (-2.20, 12.32)  | 0.184            |
| HDL-C                     | 0.020 (0.008)  | 2.06 (0.55, 3.59)    | <b>0.007</b>     | 0.010 (0.016)                          | 0.97 (-2.13, 4.16)   | 0.544            |
| Apo-A                     | 0.012 (0.009)  | 1.20 (-0.50, 2.93)   | 0.169            | 0.022 (0.017)                          | 2.23 (-1.11, 5.69)   | 0.193            |
| Apo-B                     | 0.014 (0.007)  | 1.40 (-0.05, 2.87)   | 0.059            | 0.019 (0.010)                          | 1.89 (-0.05, 3.87)   | 0.057            |
| <b>T2DM</b>               | 0.159 (0.034)  | 17.20 (9.75,25.15)   | <b>&lt;0.001</b> | 0.165 (0.065)                          | 17.99 (3.93, 33.94)  | <b>0.011</b>     |
| <b>Non-smoke (n=3118)</b> |                |                      |                  | <b>Smoke (n=2674)</b>                  |                      |                  |
| <b>Lipid parameters</b>   |                |                      |                  |                                        |                      |                  |
| TC                        | 0.067 (0.031)  | 6.98 (0.69, 13.66)   | <b>0.029</b>     | 0.045 (0.031)                          | 4.59 (-1.60, 11.17)  | 0.149            |
| TG                        | -0.010 (0.041) | -1.03 (-8.70, 7.28)  | 0.802            | -0.032 (0.042)                         | -3.15 (-10.85, 5.21) | 0.449            |
| LDL-C                     | 0.055 (0.023)  | 5.70 (1.07, 10.55)   | <b>0.015</b>     | 0.024 (0.026)                          | 2.41 (-2.75, 7.85)   | 0.366            |
| HDL-C                     | 0.012 (0.010)  | 1.17 (-0.71, 3.07)   | 0.224            | 0.023 (0.010)                          | 2.35 (0.28, 4.47)    | <b>0.026</b>     |
| Apo-A                     | 0.022 (0.011)  | 2.20 (-0.01, 4.47)   | 0.051            | 0.016 (0.011)                          | 1.58 (-0.58, 3.79)   | 0.152            |
| Apo-B                     | 0.020 (0.009)  | 2.05 (0.25, 3.88)    | <b>0.025</b>     | 0.018 (0.010)                          | 1.84 (-0.09, 3.81)   | 0.062            |
| <b>T2DM</b>               | 0.131 (0.040)  | 13.94 (5.25, 23.35)  | <b>0.001</b>     | 0.208 (0.046)                          | 23.11 (12.52, 34.69) | <b>&lt;0.001</b> |
| <b>Non-drink (n=3738)</b> |                |                      |                  | <b>Drink (n=2041)</b>                  |                      |                  |
| <b>Lipid parameters</b>   |                |                      |                  |                                        |                      |                  |
| TC                        | 0.052 (0.036)  | 5.34 (-1.89, 13.11)  | 0.152            | 0.046 (0.028)                          | 4.73 (-0.77, 10.53)  | 0.094            |
| TG                        | -0.035 (0.051) | -3.39 (-12.63, 6.82) | 0.501            | -0.002 (0.036)                         | -0.20 (-7.07, 7.18)  | 0.957            |
| LDL-C                     | 0.032 (0.031)  | 3.28 (-2.76, 9.70)   | 0.294            | 0.034 (0.021)                          | 3.41 (-0.73, 7.71)   | 0.108            |
| HDL-C                     | 0.023 (0.013)  | 2.30 (-0.23, 4.88)   | 0.075            | 0.011 (0.008)                          | 1.15 (-0.50, 2.84)   | 0.174            |
| Apo-A                     | 0.017 (0.013)  | 1.76 (-0.72, 4.30)   | 0.165            | 0.011 (0.010)                          | 1.07 (-0.88, 3.06)   | 0.285            |
| Apo-B                     | 0.014 (0.009)  | 1.37 (-0.35, 3.11)   | 0.119            | 0.015 (0.008)                          | 1.46 (-0.13, 3.07)   | 0.071            |
| <b>T2DM</b>               | 0.108 (0.053)  | 11.36 (0.39, 23.53)  | <b>0.042</b>     | 0.184 (0.037)                          | 20.17 (11.81, 29.14) | <b>&lt;0.001</b> |

$\beta$ , estimate; SE, standard error; PC, percentage change; CI, confidence interval; TC, total cholesterol; TG, triglyceride; HDL-C, high density lipoprotein cholesterol; LDL-C,

low density lipoprotein cholesterol; Apo-A, apolipoprotein-A; Apo-B, apolipoprotein-B; T2DM, type 2 diabetes mellites.

**Notes:** All models were adjusted for age, sex, smoking or drinking status, hypertension, coronary heart disease, and body mass index. P values<0.05 were shown in bold.
